# Supplementary material for: Morphological tuning engineering of Pt@TiO2/graphene catalysts with optimal active surfaces of support for boosting catalytic performance for methanol oxidation
Source: Royal Society of Chemistry journal article supplement (doi:10.1039/d1ta09359b), 2022-01-01
Supplement: d1ta09359b1.pdf [file d1ta09359b1.pdf]

Supporting Information for:

**Morphological Tuning Engineering of Pt@TiO<sub>2</sub>/Graphene Catalysts  
with Optimal Active Surface of Support for Boosting Catalytic  
Performance to Methanol Oxidation**

Kefu Zhang, Jun Qiu, Juan Wu, Yongqi Deng, Yihan Wu, Lifeng Yan\*

Hefei National Laboratory for Physical Sciences at the Microscale, and Department of  
Chemical Physics, University of Science and Technology of China, Jinzairoad 96,  
Hefei, 230026, Anhui, China

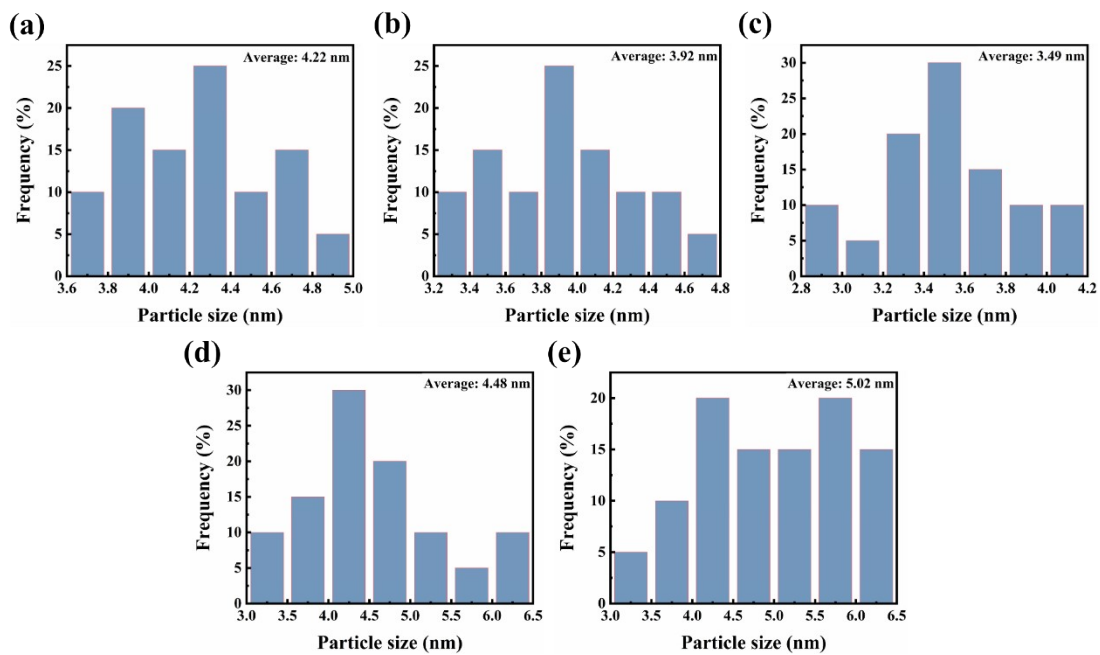

**Fig. S1** The particle diameters distribution of Pt NPs. (a) UV-Pt@TONC/GN, (b) UV-Pt@TONC&R/GN, (c) UV-Pt@TONR/GN, (d) UV-Pt/GN and (e) UV-Pt@TiO<sub>2</sub>.

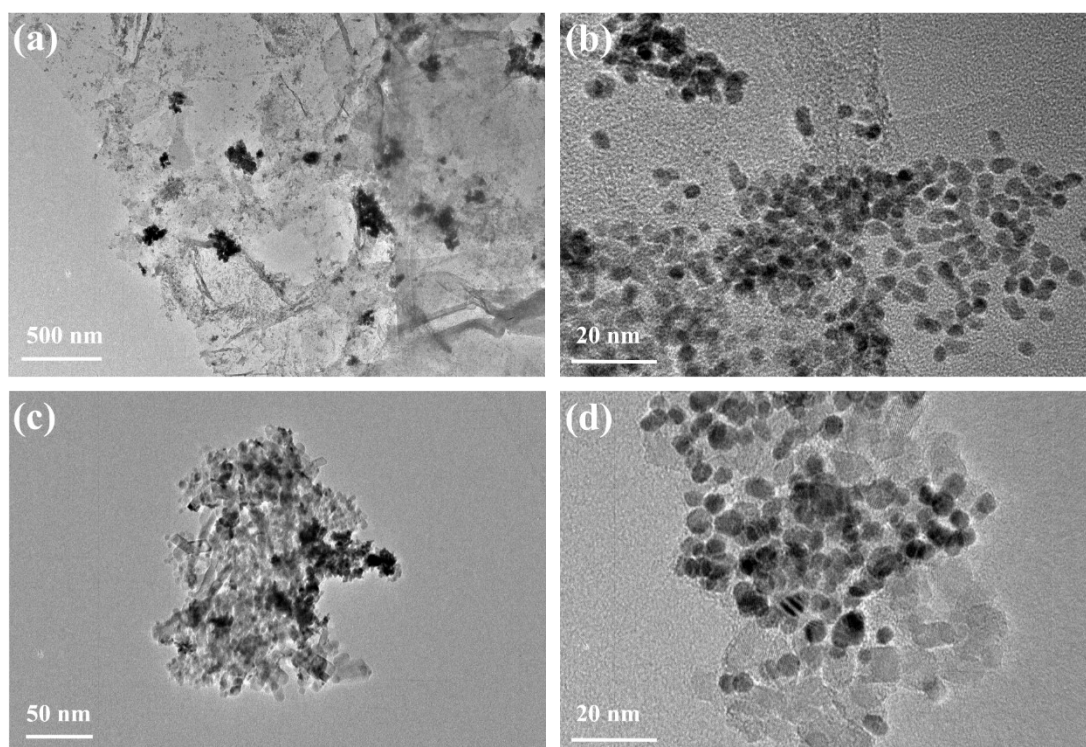

**Fig. S2** TEM images of (a,b) UV-Pt/GN and (c,d) UV-Pt@TiO<sub>2</sub> catalysts synthesized with the same procedure.

**Table S1** Surface compositions and oxidation states of Pt species derived from XPS analyses.

|                        | Pt species (%)  |                  |
|------------------------|-----------------|------------------|
|                        | Pt <sup>0</sup> | Pt <sup>2+</sup> |
| UV-Pt@TONR/GN          | 68.08           | 31.92            |
| UV-Pt@TONC&R/GN        | 61.07           | 38.93            |
| UV-Pt@TONC/GN          | 48.51           | 51.49            |
| UV-Pt /GN              | 33.21           | 66.79            |
| UV-Pt@TiO <sub>2</sub> | 42.30           | 57.70            |

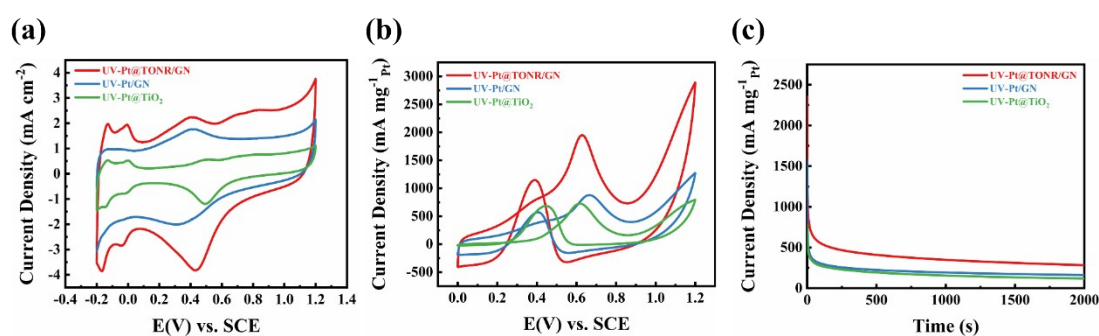

**Fig. S3** (a) CV curves, (b) MOR measurements and (c) 2000s current–time (*i*–*t*) measurements of UV-Pt@TONR/GN, UV-Pt/GN and UV-Pt@TiO<sub>2</sub> catalysts in acid media.

**Table S2** The electrochemical parameters of the designed catalysts in alkaline and acid media, respectively.

|                     | Alkaline solution                      |                                         |                           | Acid solution                          |                                         |                           |
|---------------------|----------------------------------------|-----------------------------------------|---------------------------|----------------------------------------|-----------------------------------------|---------------------------|
|                     | ECSA (m <sup>2</sup> g <sup>-1</sup> ) | MA (mA mg <sup>-1</sup> <sub>Pt</sub> ) | SA (mA cm <sup>-2</sup> ) | ECSA (m <sup>2</sup> g <sup>-1</sup> ) | MA (mA mg <sup>-1</sup> <sub>Pt</sub> ) | SA (mA cm <sup>-2</sup> ) |
| UV-Pt@TONR/GN       | 51.55                                  | 3165.00                                 | 6.14                      | 60.69                                  | 1945.63                                 | 3.21                      |
| UV-Pt@TONC&R/GN     | 46.43                                  | 2587.57                                 | 5.57                      | 47.25                                  | 1367.39                                 | 2.89                      |
| UV-Pt@TONC/GN       | 43.71                                  | 1917.14                                 | 4.39                      | 41.58                                  | 1037.67                                 | 2.50                      |
| Pt/GN               | 40.86                                  | 1447.20                                 | 3.54                      | 36.07                                  | 876.58                                  | 2.43                      |
| Pt@TiO <sub>2</sub> | 36.12                                  | 924.8                                   | 2.56                      | 39.32                                  | 724.41                                  | 1.84                      |
| Commercial Pt/C     | 42.40                                  | 686.95                                  | 1.62                      | 40.98                                  | 445.37                                  | 1.09                      |

**Table S3** The performance of various MOR electrocatalysts in alkaline / acid electrolytes in recent years.

| Catalyst                                              | Electrolyte                                                        | ECSA<br>(m <sup>2</sup> g <sup>-1</sup> ) | Mass activity<br>(mA mg <sup>-1</sup> Pt) | Ref.      |
|-------------------------------------------------------|--------------------------------------------------------------------|-------------------------------------------|-------------------------------------------|-----------|
| UV-Pt@TONR/GN                                         | 1 M KOH + 1 M<br>CH <sub>3</sub> OH                                | 51.55                                     | 3165                                      | This work |
| Pt-Ce(CO <sub>3</sub> )OH/rGO                         | 1 M KOH + 1 M<br>CH <sub>3</sub> OH                                | 60.36                                     | 1447.5                                    | 1         |
| Pd <sub>59</sub> Cu <sub>33</sub> Ru <sub>8</sub> NSs | 1 M KOH + 1 M<br>CH <sub>3</sub> OH                                | 35.3                                      | 1660.8                                    | 2         |
| Pt/g-C <sub>3</sub> N <sub>4</sub> /MoS <sub>2</sub>  | 1 M KOH + 1 M<br>CH <sub>3</sub> OH                                | --                                        | 1618                                      | 3         |
| PtCu NFs                                              | 0.5 M KOH + 1 M<br>CH <sub>3</sub> OH                              | 12.4                                      | 2110                                      | 4         |
| Pt-NiO                                                | 1 M KOH + 1 M<br>CH <sub>3</sub> OH                                | 26.0                                      | 880                                       | 5         |
| Pt/Ni(OH) <sub>2</sub> /rGO                           | 1 M KOH + 1 M<br>CH <sub>3</sub> OH                                | 64.1                                      | 1200                                      | 6         |
| UV-Pt@TONR/GN                                         | 0.5 M H <sub>2</sub> SO <sub>4</sub> + 1 M<br>CH <sub>3</sub> OH   | 60.69                                     | 1945.63                                   | This work |
| Pt/NiCoP <sub>x</sub> @NCNT-<br>NG                    | 0.5 M H <sub>2</sub> SO <sub>4</sub> + 1 M<br>CH <sub>3</sub> OH   | 54.2                                      | 867                                       | 7         |
| Pt-Ag DSNCs                                           | 0.5 M H <sub>2</sub> SO <sub>4</sub> + 1 M<br>CH <sub>3</sub> OH   | 17.8                                      | 566.8                                     | 8         |
| p-Pt/TNR@GC                                           | 0.5 M HClO <sub>4</sub> + 0.5<br>M CH <sub>3</sub> OH              | 62.6                                      | 1120                                      | 9         |
| PtRu NWs                                              | 0.5 M H <sub>2</sub> SO <sub>4</sub> + 0.5<br>M CH <sub>3</sub> OH | 12.4                                      | 820                                       | 10        |
| PtNi/ceria                                            | 0.1 M HClO <sub>4</sub> + 0.5<br>M CH <sub>3</sub> OH              | 36.9                                      | 1500                                      | 11        |

|                          |                                                                    |      |       |    |
|--------------------------|--------------------------------------------------------------------|------|-------|----|
| Pt/TiO <sub>2</sub> /rGO | 0.5 M H <sub>2</sub> SO <sub>4</sub> + 0.5<br>M CH <sub>3</sub> OH | 81.7 | 698.9 | 12 |
|--------------------------|--------------------------------------------------------------------|------|-------|----|

**Equation S1:**

$$J_p = 0.4463 \times (F^3/RT)^{1/2} \times n^{3/2} \times A \times D_0^{1/2} \times C_0^* \times v^{1/2}$$

Where F is the Faraday constant, R is the gas constant, T is the temperature of the electrooxidation reaction, n is the number of electrons transferred in the reaction, A is the surface area of the electrode, D<sub>0</sub> is diffusion coefficient; C<sub>0</sub><sup>\*</sup> is the initial concentration of electrolyte and v is the potential scan rate. The parameter values of F, R, T, A, D<sub>0</sub>, C<sub>0</sub><sup>\*</sup> are constant in the same experimental media, and the slope is determined by n<sup>3/2</sup>.

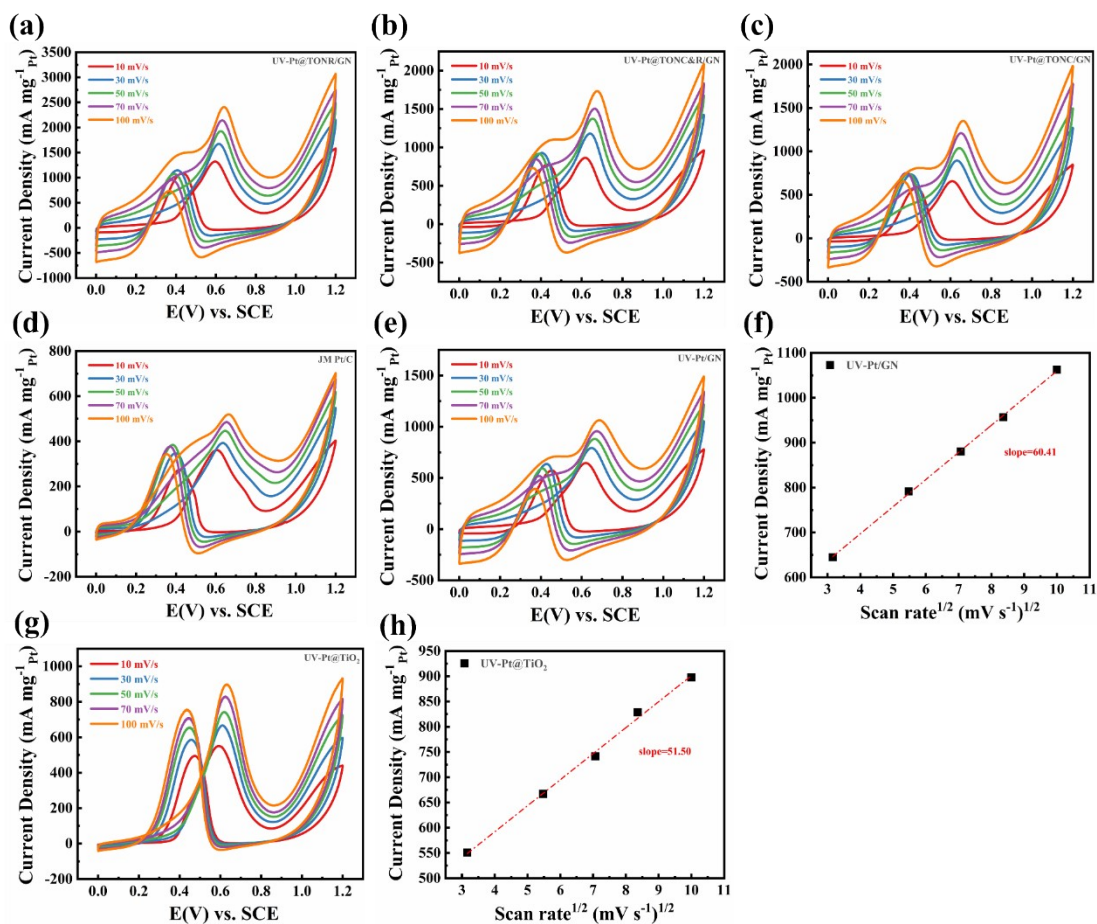



**Fig. S4** CV curves of (a) UV-Pt@TONR/GN, (b) UV-Pt@TONC&R/GN, (c) UV-Pt@TONC/GN, (d) JM Pt/C, (e) UV-Pt/GN and (g) UV-Pt@TiO<sub>2</sub> at various scan rates. The corresponding linear relationship between peak current density and the square root of sweep rate of (f) UV-Pt/GN and (h) UV-Pt@TiO<sub>2</sub> in 0.5 M H<sub>2</sub>SO<sub>4</sub> + 1 M CH<sub>3</sub>OH solution.

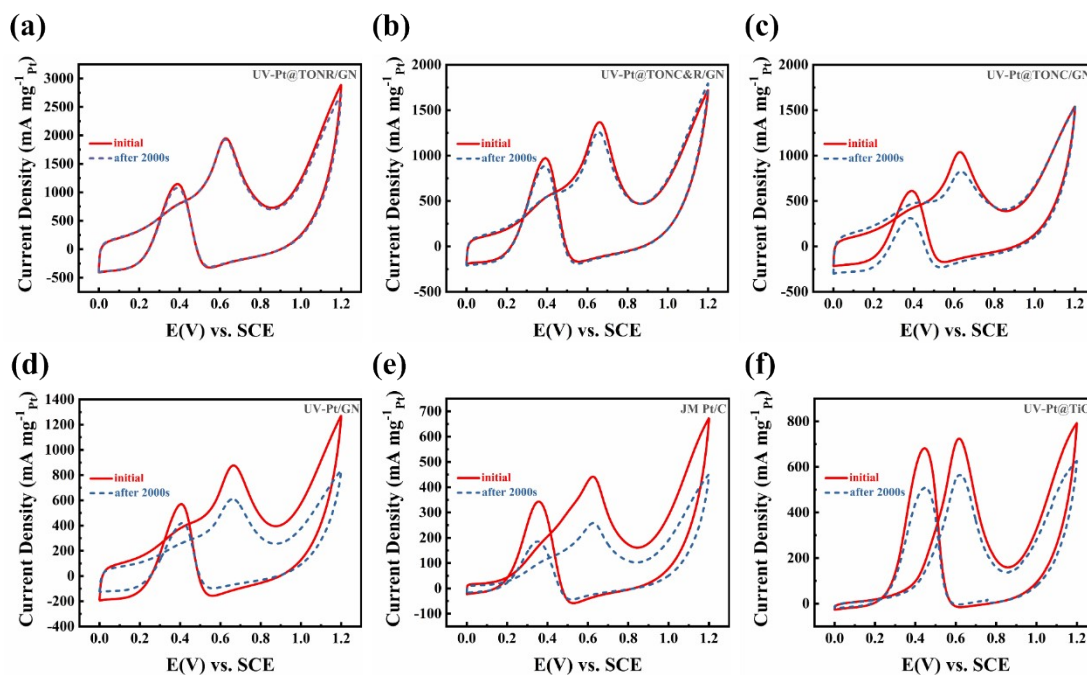

**Fig. S5** CV curves of variously prepared catalysts before and after 2000 s i-t test in 0.5 M H<sub>2</sub>SO<sub>4</sub> + 1 M CH<sub>3</sub>OH solution.

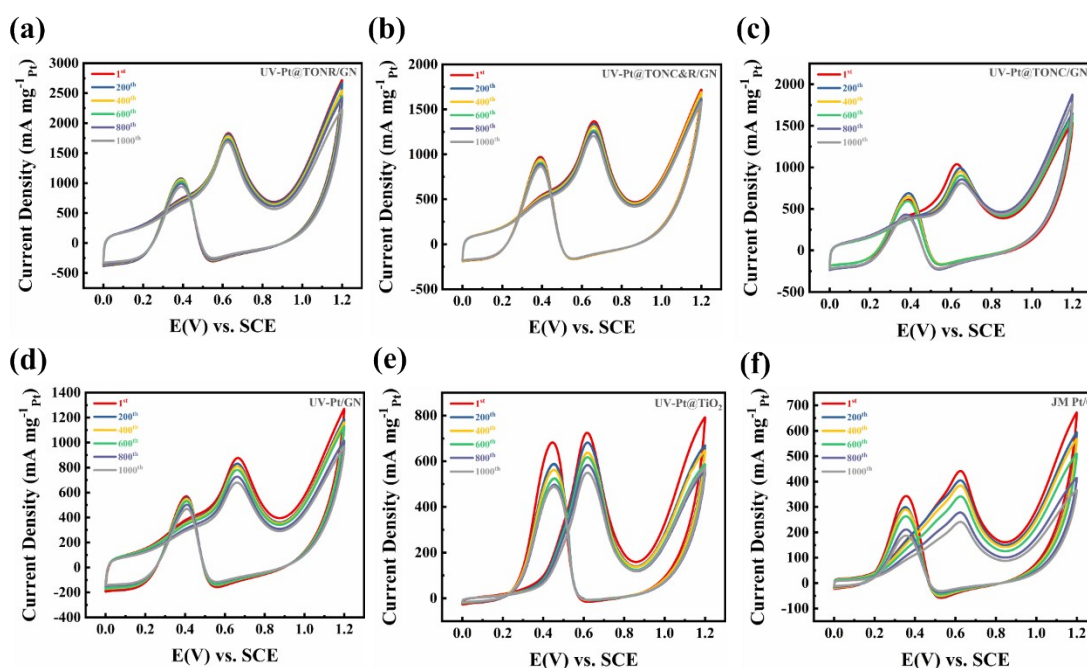

**Fig. S6** MOR CV curves of (a) UV-Pt@TONR/GN, (b) UV-Pt@TONC&R/GN, (c)

UV-Pt@TONC/GN, (d) UV-Pt/GN, (e) UV-Pt@TiO<sub>2</sub> and (f) JM Pt/C sweep for 1000 cycles in 0.5 M H<sub>2</sub>SO<sub>4</sub> + 1 M CH<sub>3</sub>OH solution.

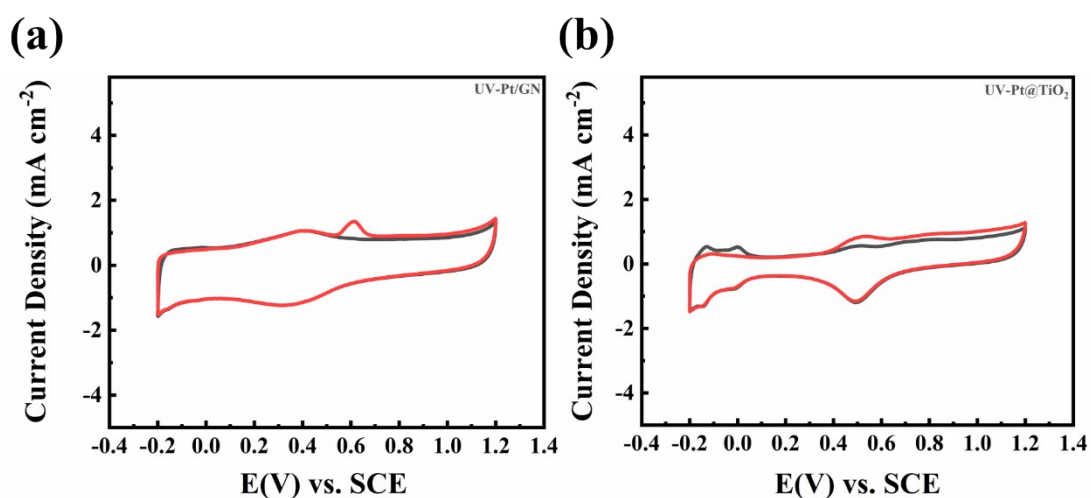

**Fig. S7** CO-stripping voltammetry measurements of (a) UV-Pt/GN and (b) UV-Pt@TiO<sub>2</sub>.

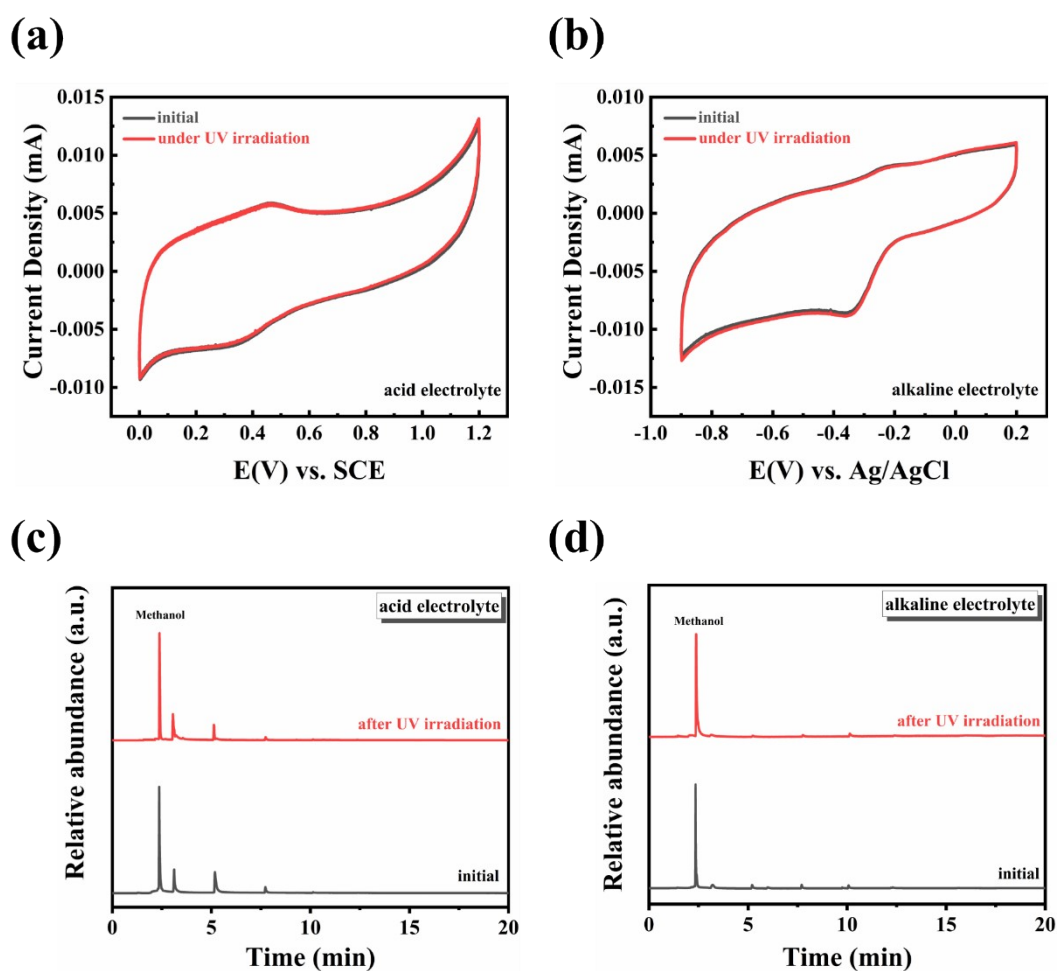

**Fig. S8** CV curves of methanol oxidation without or with UV irradiation in (a) 0.5 M

$\text{H}_2\text{SO}_4 + 1 \text{ M CH}_3\text{OH}$  solution and (b)  $1 \text{ M KOH} + 1 \text{ M CH}_3\text{OH}$  solution. Typical GC spectra of methanol electrolyte before and after UV irradiation : (c) acid electrolyte and (d) alkaline electrolyte.

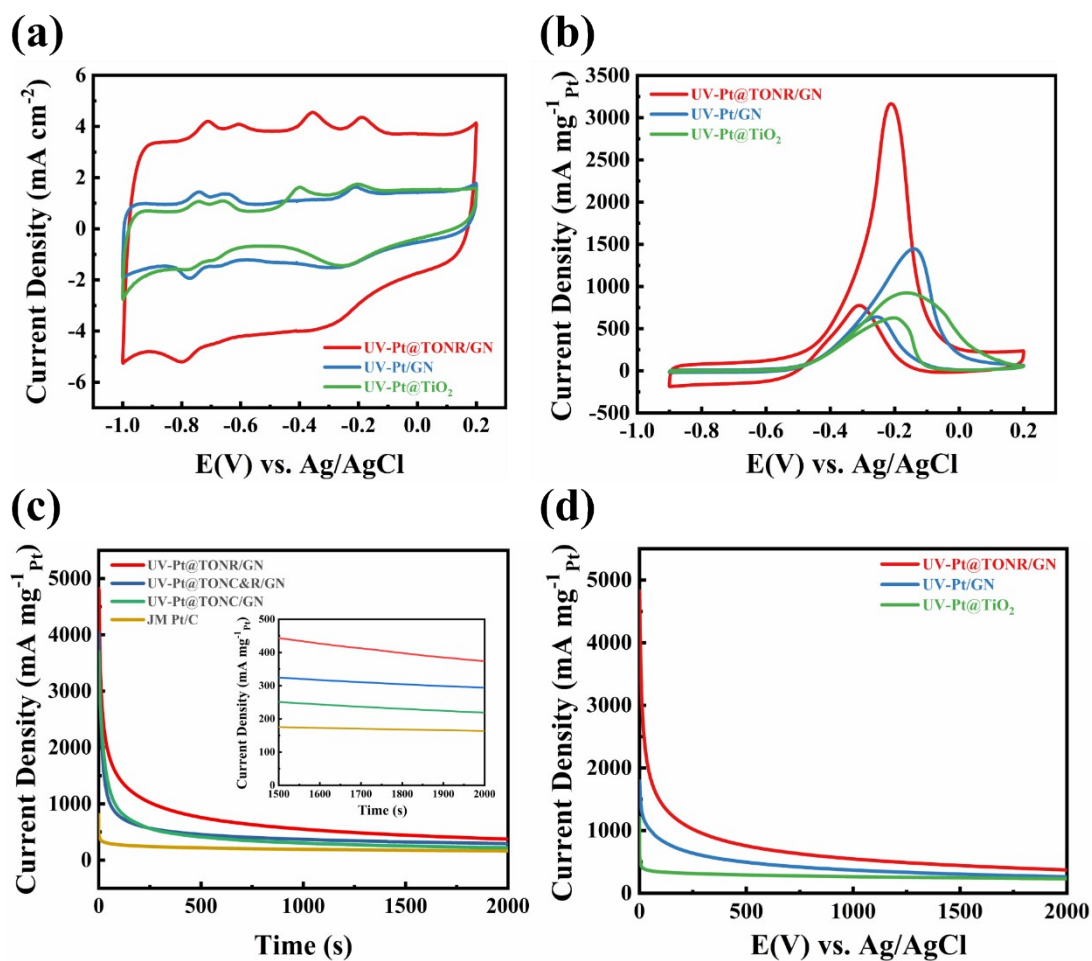

**Fig. S9** (a) CV curves, (b) MOR measurements and (c,d) 2000s current–time (i–t) measurements of the synthesized catalysts in alkaline media.



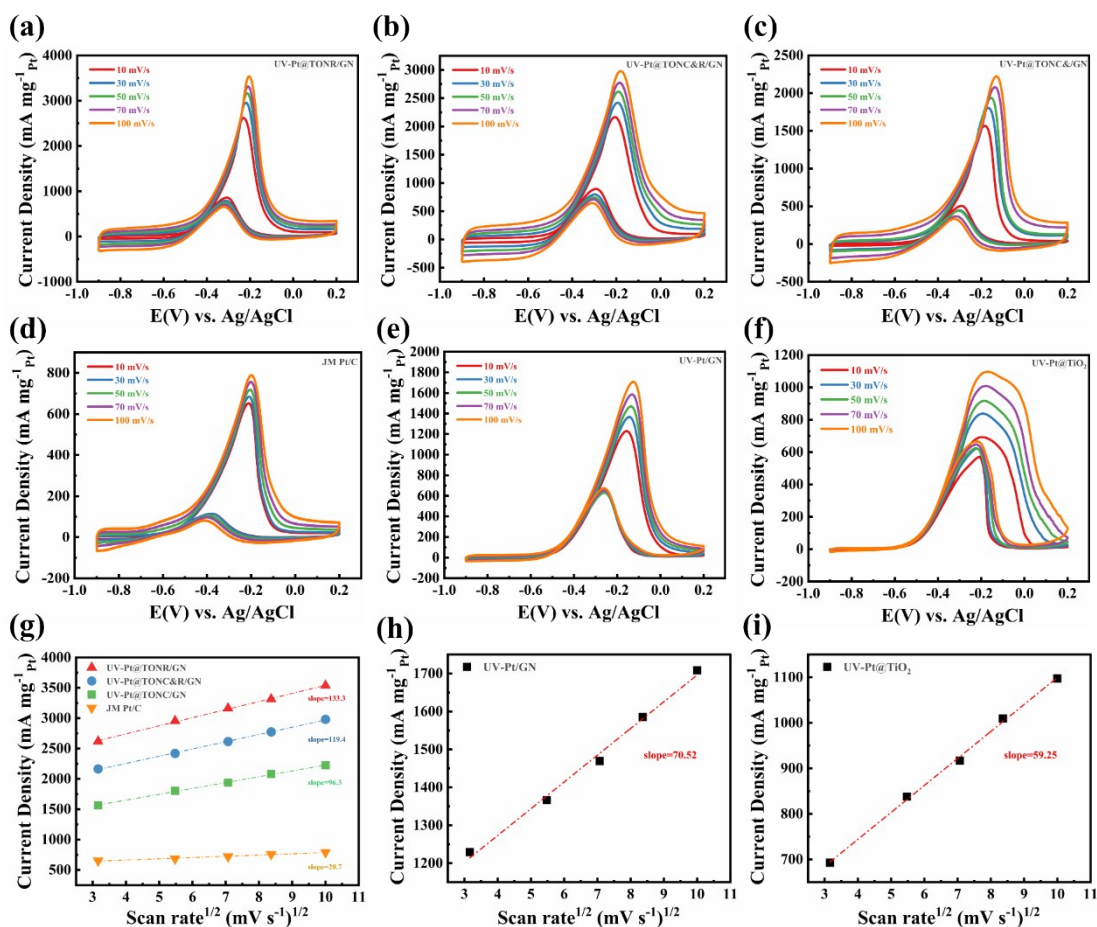

**Fig. S10** CV curves of (a) UV-Pt@TONR/GN, (b) UV-Pt@TONC&R/GN, (c) UV-Pt@TONC/GN, (d) JM Pt/C, (e) UV-Pt/GN and (f) UV-Pt@TiO<sub>2</sub> at various scan rates and (g-i) corresponding linear relationship between peak current density and the square root of sweep rate in 1 M KOH + 1 M CH<sub>3</sub>OH solution.

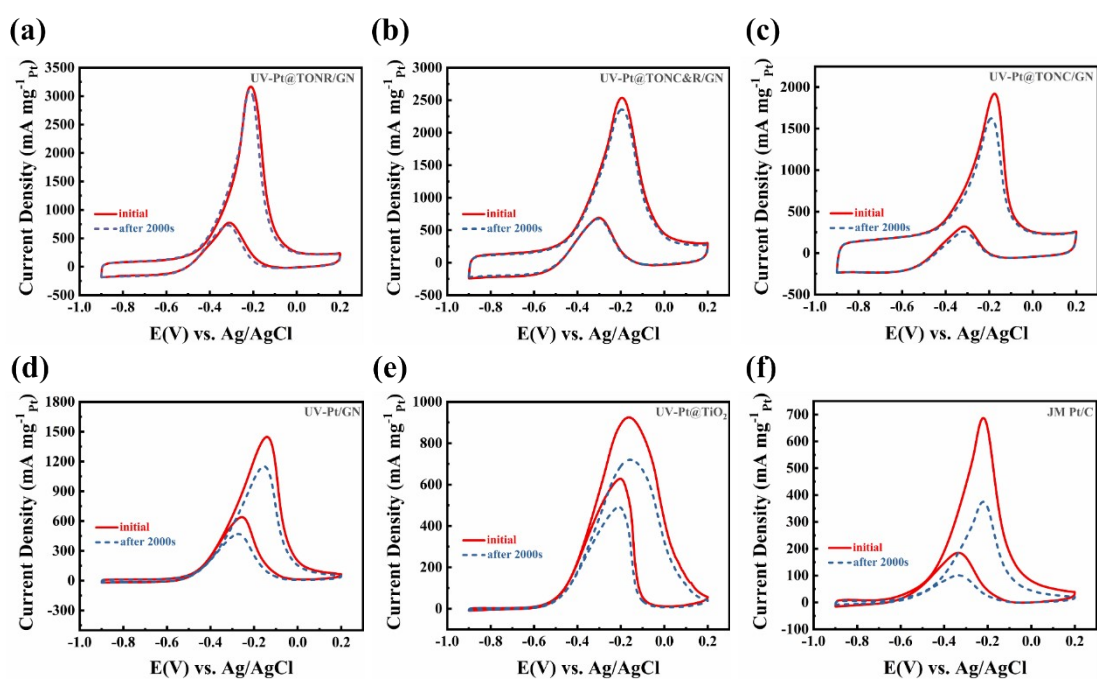

**Fig. S11** CV curves of variously prepared catalysts before and after 2000 s i-t test in 1 M KOH + 1 M CH<sub>3</sub>OH solution.

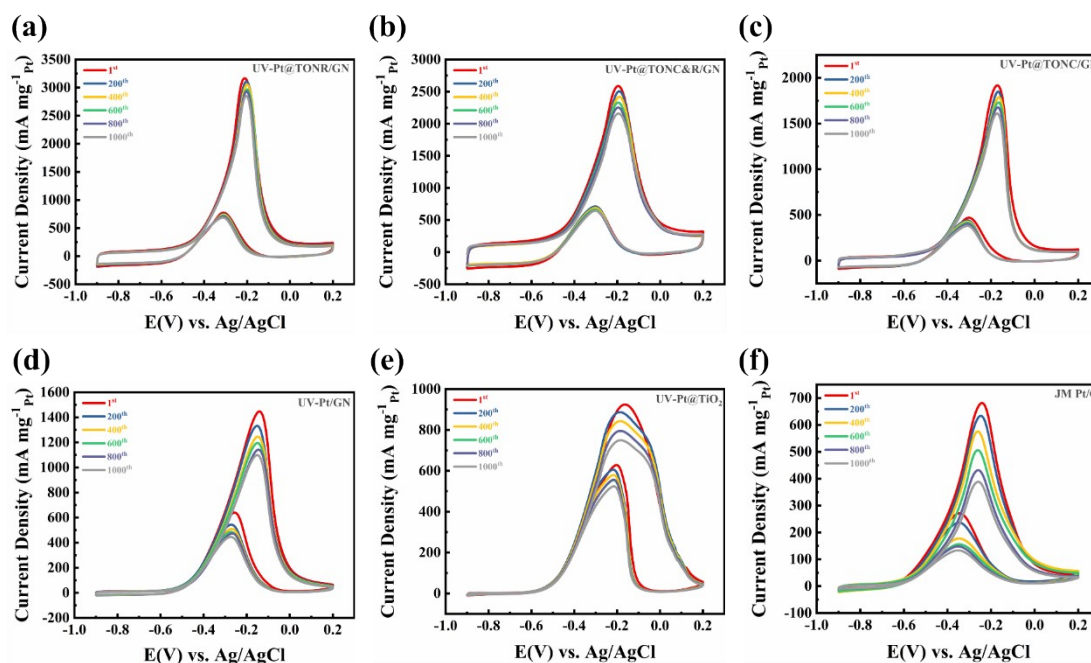

**Fig. S12** MOR CV curves of (a) UV-Pt@TONR/GN, (b) UV-Pt@TONC&R/GN, (c) UV-Pt@TONC/GN, (d) UV-Pt/GN, (e) UV-Pt@TiO<sub>2</sub> and (f) JM Pt/C sweep for 1000 cycles in 1 M KOH + 1 M CH<sub>3</sub>OH solution.

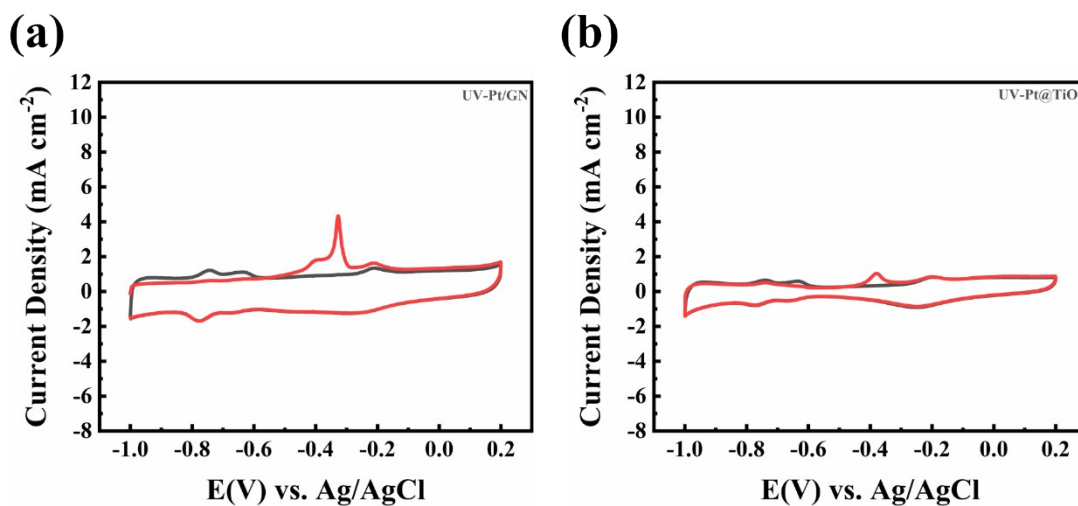

**Fig. S13** CO-stripping voltammetry measurements of (a) UV-Pt/GN and (b) UV-Pt@TiO<sub>2</sub> in 1 M KOH.

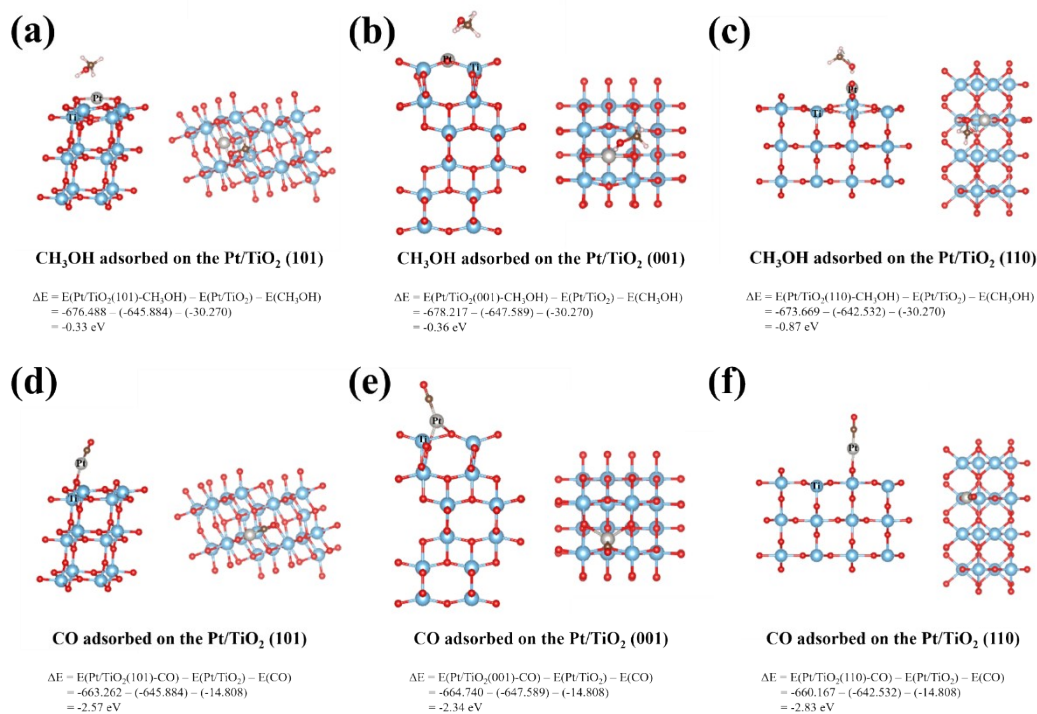

**Fig. S14** Structures of adsorbed CH<sub>3</sub>OH on (a) Pt/TiO<sub>2</sub>(101), (b) Pt/TiO<sub>2</sub>(001), (c) Pt/TiO<sub>2</sub>(110) and CO on (d) Pt/TiO<sub>2</sub>(101), (e) Pt/TiO<sub>2</sub>(001), and (f) Pt/TiO<sub>2</sub> (110) surfaces and corresponding adsorption energies.

**CH<sub>3</sub>OH → CO**

$$\Delta E = E(\text{Pt/TiO}_2(101)\text{-CO}) - E(\text{Pt/TiO}_2(101)\text{-CH}_3\text{OH}) - E(\text{CO}) + E(\text{CH}_3\text{OH})$$

$$= -663.262 - (-676.488) - (-14.808) + (-30.270)$$

$$= -2.236 \text{ eV}$$

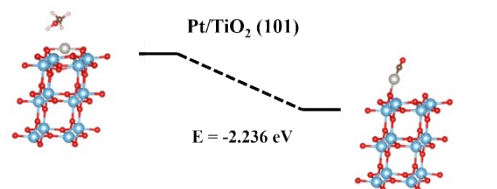

**CH<sub>3</sub>OH → CO**

$$\Delta E = E(\text{Pt/TiO}_2(001)\text{-CO}) - E(\text{Pt/TiO}_2(001)\text{-CH}_3\text{OH}) - E(\text{CO}) + E(\text{CH}_3\text{OH})$$

$$= -664.740 - (-678.217) - (-14.808) + (-30.270)$$

$$= -1.985 \text{ eV}$$

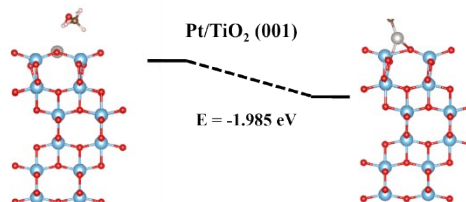

**CH<sub>3</sub>OH → CO**

$$\Delta E = E(\text{Pt/TiO}_2(110)\text{-CO}) - E(\text{Pt/TiO}_2(110)\text{-CH}_3\text{OH}) - E(\text{CO}) + E(\text{CH}_3\text{OH})$$

$$= -660.167 - (-673.669) - (-14.808) + (-30.270)$$

$$= -1.960 \text{ eV}$$

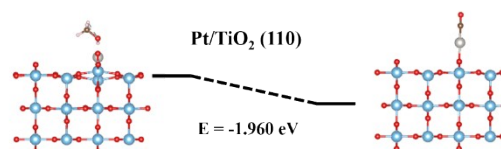

**Fig. S15** Calculated formation energies obtained from the difference of the binding energies of CH<sub>3</sub>OH and CO on Pt/TiO<sub>2</sub>(101), Pt/TiO<sub>2</sub>(001) and Pt/TiO<sub>2</sub>(110) surfaces.

## References

1. G. Chen, Z. Dai, L. Sun, L. Zhang, S. Liu, H. Bao, J. Bi, S. Yang and F. Ma, *J. Mater. Chem. A*, 2019, **7**, 6562-6571.
2. L. Jin, H. Xu, C. Chen, H. Shang, Y. Wang, C. Wang and Y. Du, *ACS Appl. Mater. Interfaces.*, 2019, **11**, 42123-42130.
3. C. Zhai, M. Sun, L. Zeng, M. Xue, J. Pan, Y. Du and M. Zhu, *Appl. Catal. B.*, 2019, **243**, 283-293.
4. Z. Zhang, Z. Luo, B. Chen, C. Wei, J. Zhao, J. Chen, X. Zhang, Z. Lai, Z. Fan, C. Tan, M. Zhao, Q. Lu, B. Li, Y. Zong, C. Yan, G. Wang, Z. J. Xu and H. Zhang, *Adv. Mater.*, 2016, **28**, 8712-8717.
5. Z. Gu, D. Bin, Y. Feng, K. Zhang, J. Wang, B. Yan, S. Li, Z. Xiong, C. Wang, Y. Shiraishi and Y. Du, *Appl. Surf. Sci.*, 2017, **411**, 379-385.
6. W. Huang, H. Wang, J. Zhou, J. Wang, P. N. Duchesne, D. Muir, P. Zhang, N. Han, F. Zhao, M. Zeng, J. Zhong, C. Jin, Y. Li, S. T. Lee and H. Dai, *Nat. Commun.*, 2015, **6**, 10035.
7. J. Ding, W. Hu, L. Ma, M. Gan, F. Xie, W. Zhan and W. Lu, *J. Power Sources*, 2021, **481**, 228888.
8. W. Yao, X. Jiang, M. Li, Y. Li, Y. Liu, X. Zhan, G. Fu and Y. Tang, *Appl. Catal. B.*, 2021, **282**, 119595.
9. C. Li, Y. Qu, L. Du, G. Chen, S. Lou, Y. Gao and G. Yin, *ACS Sustain. Chem. Eng.*, 2019, **7**, 8597-8603.
10. L. Huang, X. Zhang, Q. Wang, Y. Han, Y. Fang and S. Dong, *J. Am. Chem. Soc.*, 2018, **140**, 1142-1147.
11. Y. Kwon, Y. Kim, J. W. Hong, Y. Whang, S. Kim, D. H. Wi, H. R. Byon and S. W. Han, *J. Mater. Chem. A*, 2020, **8**, 25842-25849.
12. S. Wu, J. Liu, Y. Ye, Z. Tian, X. Zhu and C. Liang, *ACS Appl. Energy Mater.*, 2019, **2**, 5577-5583.
